# Supplementary material
Source: PubMed Central journal article supplement (PMC3129717)
Supplement: supp_01107.2010_figs1-2.pdf [file supp_01107.2010_figs1-2.pdf]

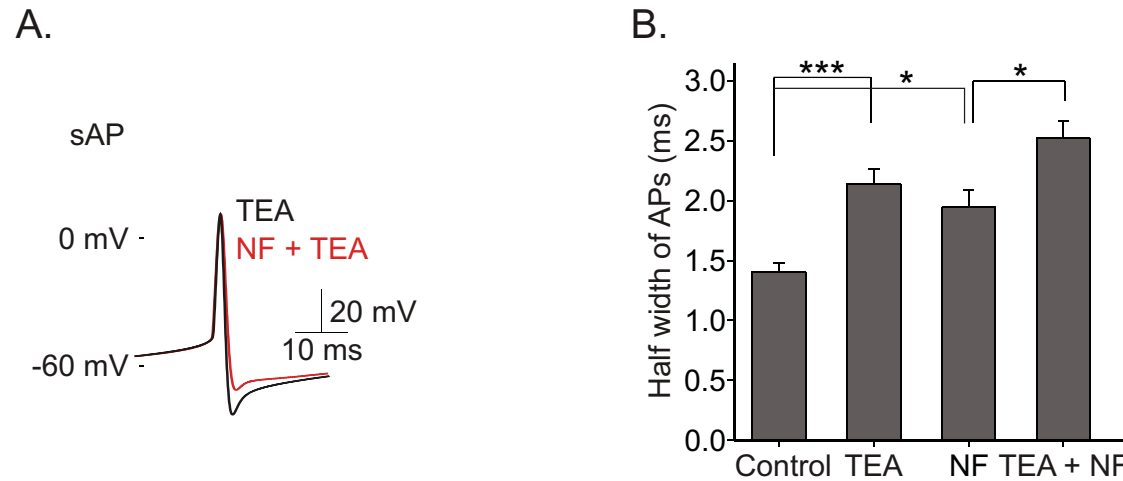

Supplementary figure 1. **Nifedipine did not change AP duration during TEA application.**

A. Examples of action potential waveforms. B. Summary of action potential half width (control,  $n=17$ ; TEA,  $n=17$ ; NF,  $n=5$ ; NF+TEA,  $n=8$ ).

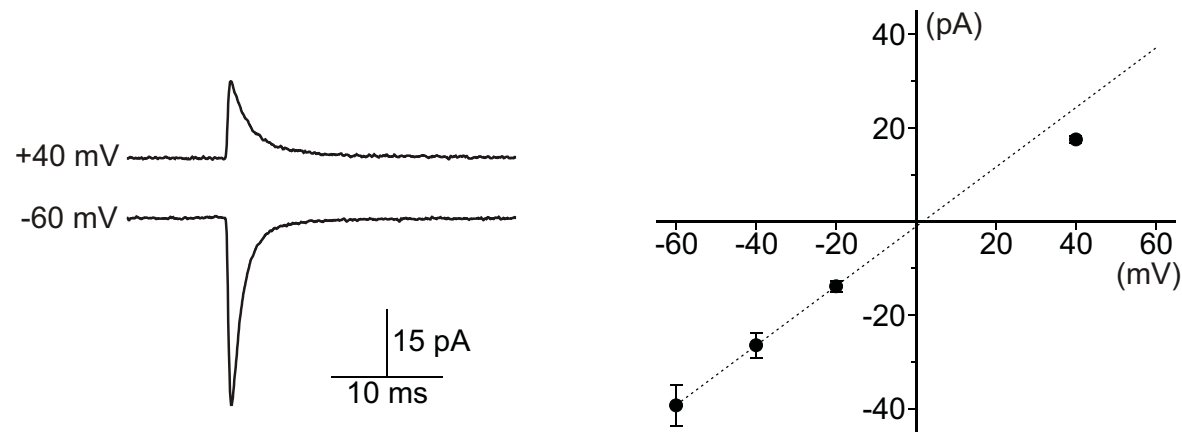

Supplementary Figure 2. **Incubation of cerebellar slices with 100  $\mu$ M ryanodine increased synaptic GluR2-containing AMPA receptors in cerebellar stellate cells.** A. Examples of average spontaneous EPSCs after 3h incubation with ryanodine at room temperature. B. I-V relationship of spontaneous EPSCs ( $n = 4$ ).
